# Supplementary material
Source: publisher site journal article supplement (https://www.dovepress.com/article/333534)
Supplement: Supplementary file 1 [file get_supplementary_file.php]

**Supplementary materials**

**APPENDIX A: SEARCH STRINGS**

**Table S1:** Search strings and articles yielded

| **Databases** | **Search strings/terms** | **Results** |
| --- | --- | --- |
| PubMed  (**From 1998-2020**) | Search (("medication adherence"[Mesh] OR ((prescription[tiab] OR medication[tiab] OR puffer[tiab] OR "inhaled corticosteroid"[tiab]) AND (adherence[tiab] OR compliance[tiab] OR filling[tiab] OR dispensing[tiab] OR dispensed[tiab] OR filled[tiab]))) AND ("Asthma"[Mesh] OR asthma[tiab])) Filters: Publication date from 1998/01/01 to 2020/12/31; Humans | 1967 studies/articles |
| Updated PubMed Search  (**from 1998 to 2021**) | (("medication adherence"[MeSH Terms] OR (("prescription"[Title/Abstract] OR "medication"[Title/Abstract] OR "puffer"[Title/Abstract] OR "inhaled corticosteroid"[Title/Abstract]) AND ("adherence"[Title/Abstract] OR "compliance"[Title/Abstract] OR "filling"[Title/Abstract] OR "dispensing"[Title/Abstract] OR "dispensed"[Title/Abstract] OR "filled"[Title/Abstract]))) AND ("Asthma"[MeSH Terms] OR "Asthma"[Title/Abstract])) AND ((1998/1/1:2021/3/16[pdat]) AND (english[Filter])) | 2456  Found additional **489** studies |
| Embase  (from **1998 to 2020**) | ('medication compliance'/exp OR ((prescription:ti,ab OR medication:ti,ab OR puffer:ti,ab OR 'inhaled corticosteroid':ti,ab) AND (adherence:ti,ab OR compliance:ti,ab OR filling:ti,ab OR dispensing:ti,ab OR dispensed:ti,ab OR filled:ti,ab))) AND ('asthma'/exp OR asthma:ti,ab) AND [humans]/lim AND [1998-2020]/py | 4148 studies |
| Updated Embase  (From **1998 to 2021**) | ('medication compliance'/exp OR ((prescription:ti,ab OR medication:ti,ab OR puffer:ti,ab OR 'inhaled corticosteroid':ti,ab) AND (adherence:ti,ab OR compliance:ti,ab OR filling:ti,ab OR dispensing:ti,ab OR dispensed:ti,ab OR filled:ti,ab))) AND ('asthma'/exp OR asthma:ti,ab) AND (1998:py OR 1999:py OR 2000:py OR 2001:py OR 2002:py OR 2003:py OR 2004:py OR 2005:py OR 2006:py OR 2007:py OR 2008:py OR 2009:py OR 2010:py OR 2011:py OR 2012:py OR 2013:py OR 2014:py OR 2015:py OR 2016:py OR 2017:py OR 2018:py OR 2019:py OR 2020:py OR 2021:py) AND 'human'/de AND ('allergic asthma'/dm OR 'asthma'/dm OR 'mild persistent asthma'/dm OR 'severe persistent asthma'/dm) | 4479 studies  Found additional  **331 studies** |
| International Pharmaceutical Abstracts (IPA) | (prescription OR medication OR puffer OR "inhaled corticosteroid") AND (adherence OR compliance OR filling OR dispensing OR dispensed OR filled) AND asthma | 321 studies |

**APPENDIX B: RISK OF BIAS TABLE**

**Table S2: Risk of Bias Ratings for Cohort Studies (Yes, No, Unclear)**

| First author (year) | Was the intervention delivered in a standardized manner? | Was exposure measured in reliable and valid manner? | Were confounding factors identified? | Were strategies to deal with confounds stated? | Were participants free of outcome at start of study? | Were outcomes measured in reliable and valid way? | Was follow-up time reported and sufficient for outcomes to occur? | Was follow-up completed? If not, were reasons for attrition stated and explored? | Were strategies used to address incomplete follow-up? | Were appropriate statistical analyses used? |
| --- | --- | --- | --- | --- | --- | --- | --- | --- | --- | --- |
| Averell et al (2019) | N/A | Yes | Yes | Yes | Yes | Yes | Yes | N/A | N/A | Yes |
| Backer et al (2018) | N/A | Yes | unclear | unclear | Yes | Yes | unclear | unclear | unclear | Yes |
| Balkrishnan and Christensen (2001) | N/A | Yes | No | unclear | Yes | Yes | unclear | unclear | unclear | Yes |
| Bidwal et al (2017) | N/A | Yes | unclear | unclear | Yes | Yes | No | N/A | N/A | Yes |
| Blais et al (2011) | N/A | Yes | N/A | N/A | Yes | Yes | N/A | N/A | N/A | Yes |
| Blais et al (2014) | N/A | Yes | unclear | No | Yes | Yes | Unclear | N/A | N/A | Yes |
| Blais et al (2017) | N/A | Yes | No | No | Yes | Yes | N/A | N/A | No | Yes |
| Covvey et al (2014) | N/A | Yes | Yes | Yes | Yes | Yes | N/A | N/A | N/A | Yes |
| Darba’ et al (2016) | N/A | Yes | Yes | Yes | Yes | Yes | N/A | N/A | Yes | Yes |
| Feehan et al (2015) | N/A | Yes | No | No | Yes | Yes | No | No | No | Yes |
| Friedman et al (2010) | N/A | Yes | Yes | Yes | Yes | Yes | N/A | N/A | unclear | Yes |
| Gelzer et al (2019) | Yes | Yes | Yes | Yes | Yes | Yes | Yes | Yes | unclear | Yes |
| Guo et al (2012) | N/A | Yes | Yes | Yes | Yes | Yes | Yes | Yes | Yes | Yes |
| Hagiwara et al (2013) | N/A | Yes | Yes | Yes | Yes | Yes | Yes | Yes | Unclear | Yes |
| Hardstock et al (2019) | N/A | Yes | Unclear | Unclear | Yes | Unclear | Unclear | Unclear | Unclear | Yes |
| Ismaila et al (2014) | N/A | Yes | Yes | Yes | Yes | Yes | Yes | Yes | Yes | Yes |
| Kang et al (2017) | N/A | Yes | Yes | Yes | Yes | Yes | Unclear | Unclear | Unclear | Yes |
| Kelloway et al (2000) | N/A | Yes | Unclear | Unclear | Yes | Yes | Probably yes | Unclear | Unclear | No |
| Makhinova et al (2015) | N/A | Yes | Yes | Yes | Yes | Yes | Unclear | Unclear | Unclear | Yes |
| Navaratnam et al (2011) | N/A | Yes | Yes | Yes | Yes | Yes | Unclear | Unclear | Unclear | Yes |
| Papi et al (2018) | N/A | Yes | Yes | Yes | Yes | Yes | Unclear | Unclear | Unclear | Yes |
| Sicras-Mainar et al (2017) | N/A | Yes | Unclear | Unclear | Yes | Yes | Yes | Yes | Unclear | Yes |
| [Souverein](https://www-sciencedirect-com.qe2a-proxy.mun.ca/science/article/pii/S2213219816304238" \l "!) et al (2016) | N/A | Yes | Unclear | Unclear | Yes | Yes | Yes | Yes | Yes | Yes |
| Standford et al (2019) | N/A | Yes | Yes | Yes | Yes | Yes | Yes | Yes | Yes | Yes |
| Stern et al (2006) | N/A | Yes | Yes | Yes | Yes | Yes | Yes | Yes | Yes | Yes |
| Svedsater et al (2019) | N/A | Yes | Unclear | Unclear | Yes | Yes | Unclear | Unclear | Unclear | Yes |
| Taylor et al (2014) | N/A | Yes | Yes | Yes | Yes | Yes | Unclear | Unclear | Unclear | Yes |
| Vaidya et al (2019) | N/A | Yes | Yes | Yes | Yes | Yes | Unclear | Unclear | Unclear | Yes |
| Vaidya et al (2013) | N/A | Yes | Yes | Yes | Yes | Yes | Yes | Yes | Yes | Yes |
| Van Boven et al (2020) | N/A | Yes | Yes | Yes | Yes | Yes | Yes | Yes | Yes | Yes |
| Vervloet et al (2020) | N/A | Yes | Yes | Yes | Yes | Yes | Yes | Yes | Yes | Yes |
| Williams et al (2012) | N/A | Yes | Unclear | Unclear | Yes | Yes | Yes | Probably yes | No | Yes |
| Woodcroft et al (2016) | N/A | Yes | Unclear | Unclear | Yes | Yes | Yes | Probably yes | Unclear | Yes |
| Wu et al (2015) | N/A | Yes | Yes | Yes | Yes | Yes | Unclear | Unclear | Unclear | Yes |
| Zhang et al (2016) | N/A | Yes | Yes | Yes | Yes | Yes | No | No | No | Yes |

**Table S2a: Confidence in the Evidence from reviews of quantitative research ratings of studies included in the meta-analysis using GRADE**

| **No of studies** | **Exposure** | **Outcome** | **Limitations** | **Inconsistency** | **Indirectness** | **Imprecision** | **Publication bias** | **Estimate of effect of result** | **Confidence in evidence** |
| --- | --- | --- | --- | --- | --- | --- | --- | --- | --- |
| 3 cohort studies | Adherence rate (MPR: 0.75-1.00) | Asthma exacerbation | Concerns unlikely to alter outcome | Not serious | Not serious | Not serious | Probably serious | Pooled effect was OR: 0.56, 95%CI: 0.41-0.77 | Moderate |
| 4 cohort studies | Average MPR (mean/Median/75th percentile) | Asthma exacerbation | Concerns unlikely to alter outcome | Not serious | Not serious | Not serious | Not serious | Pooled estimate: OR: 1.01, 95% CI:0.78-1.31 | Moderate |
| 3 cohort studies | Adherence rates (MPR >=0.50) | Asthma exacerbation | Concerns unlikely to alter outcome | serious | Not serious | Not serious | Not serious | Pooled estimate-OR: 0.71, 95% CI:0.54-0.94 | Moderate |

OR=odds ratio, 95%CI: 95% confidence interval, MPR=Medication possession ratio

**APPENDIX C: ADHERENCE THRESHOLD AND OUTCOMES**

**Table S3: Adherence Thresholds and Clinical Outcomes**

| **Study** | **Medication adherence rate ± Standard Deviation** | **Medication adherence rate cut-off value** | **Likelihood to reach the targeted clinical outcome with the medication adherence threshold (OR, HR, RR and confidence interval [CI])** | **Percentage of patients below medication adherence threshold** |
| --- | --- | --- | --- | --- |
| Bidwal et al (2017) | MPR  0.55. Average MPR in (medium-high) group was 0.66 compared to 0.13 in low adherence group. | 0.80 | Patients with low adherence (66.1%) had fewer medication refills (2.3 vs. 5.3; *P<0.0001*), fewer primary care provider visit (3.4 vs 5.0; *p*<0.001); and lower asthma control test (ACT) scores (13.1 vs 17.3; *p*<0.001), lower AMR (0.7 vs 0.9; *p*<0.001). | 66.1% |
| D’Ancona et al (2020) | MPR  0.81 ± 0.32 | 0.75 | Good adherence resulted in reduction in OCS dose [(median percentage OCS reduction 100(IQR 74–100) versus 60(IQR 27–100); *p*=0.031)]; reduced exacerbation [(AER change -2.1±3.1 versus 0.3±2.5; *p=*0.011); and (adjusted OR 3.19; 95%CI 1.02–9.94; *p*=0.045) for likelihood of stopping maintenance OCS. | 18% |
| Ismaila et al (2014) | MPR | 0.80 | Patients achieving adherence at 0.80 recorded reduced adjusted odds of exacerbations (OR=0.48; 95% CI: 0.44–0.54) and lower rate of healthcare utilization [ER visits: 0.48 (0.36-0.64), hospitalizations: 0.49 (0.42-0.57), ICU admissions: 0.62(0.39-0.98). | 57.3% |
| Martin et al (2013) | MPR | 1.00 | Severe exacerbations were more common in patients who achieved an adherence at MPR>100%. Conversely, risk domain asthma control (RDAC) was lower in patients with MPR>100%. Exacerbations were likely to be uncommon among those with MPR≤100%. | 99.93% |
| Papi et al (2018) | MPR | 0.80 | Compared to the non-adherent patients, the study found an increasing proportion of adherent patients in the elevated blood eosinophil group having 2 or more exacerbations (14.0% vs 7.2%, p=0.0003) and uncontrolled asthma (73% vs 60.8%; *p=0.004*). | 81% |
| Stern et al (2006) | MPR  0.24±0.25 | Median MPR (0.14) or 75th percentile of MPR (0.33) | Compared to less compliant patients, more compliant patients were less likely to experience exacerbations (odds ratio, 0.94; 95% confidence interval, 0.91–0.97; P < .001) using Median MPR as threshold. The study further recorded reduced exacerbation for compliant patients when the 75th percentile of MPR values was used as the threshold. (Odds ratio, 0.89; 95% confidence interval, 0.86–0.92; P < .001). | 49.1% for median MPR, and 74.9% for 75th percentile MPR. |
| Sicras-Mainar et al (2017) | MPR | 0.80 | 63.4% of the non-adherent patients suffered at least one exacerbation. In other words, achieving adherence at MPR>0.8 was associated with reduced risk of asthma exacerbation. | 49% |
| Zhang et al (2016) | MPR | 0.80 | Non adherent patients experienced increased in disease severity (having more than 2 exacerbations was associated with upward healthcare cost. |  |
| Kang et al (2018) | MPR | 0.50 | Achieving MPR ≥ 0.5 compared with low MPR (<0.2) was associated with reduced asthma exacerbations in moderate asthma patients with OR: 0.828, 95% CI: (0.707-0.971), severe asthma: OR 0.362, 0.185-0.708. |  |
| Guo et al (2012) | Average MPR : 0.23 (mean 0.14) for ICS & LABAs; 0.66(median 0.46) across all medications | Average: 0.66 (median 0.46) across all medications | The odds ratios of an asthma related emergency department (ED) visit was 0.81 (0.79-0.84) for a higher ICS-and LABA MPR, but the odds ratio of asthma-related hospitalization or intubation was 1.56(1.50-1.62). |  |
| Delea et al (2008) | Mean MPR: +0.25 | Mean MPR: +0.25 | OCS initiation and ED visits🡪0.97 (0.94, 0.996) for OCS; 0.90 (0.89-0.92) for ED visit or hospitalization. |  |
| William (2012) | MPR: >0.75 versus <0.25 | MPR: >0.75 versus <0.25 | Combined asthma exacerbations (ED/hosp/OCS )🡪 HR: 0.89 (0.81–0.97), equivalent to OR: 0.58 |  |
| Gelzer et al (2019) | PDC | 0.68 | Resulted in reduction in emergency department (ED) visits. |  |
| Averell et al (2019) | PDC  0.453±0.300 | 0.5, 0.8 | Better adherence and lower risk of discontinuing treatment |  |
| Korgaonkar et al (2018) | PDC | 0.80 | Asthma patients with depression had had a greater risk of asthma-related ED visits (Risk Ratio [RR] 1.33, 95% Confidence Interval [CI]: 1.20 – 1.46, p < 0.001) and asthma related hospitalizations (RR 2.79, 95% CI: 1.75 – 4.44, p < 0.001) as compared to those without depression |  |
| Makhinova et al (2015) | PDC  0.322 ± 0.197 | 0.50 | Excessive SABA use was associated with patients who were adherent to controller therapy. Excessive SABA use was also associated with increased risk of asthma exacerbation. |  |
| Wu et al (2015) | PDC  Mean PDC for ICS=0.19, mean PDC for LTRA= 0.30; mean PDC for ICS/LABA =0.25. | 0.75 | Evidence of asthma patients’ adherence to their prescribed controller medications was poor. |  |

**APPENDIX D: META REGRESSION**

**Table S4: Meta-regression analyses (**Dependent variable: log of odds ratio for asthma exacerbation/ED visits**)**

| Variable | Model 1 (univariate) | | |  | Model 2 (multivariate) | | | |
| --- | --- | --- | --- | --- | --- | --- | --- | --- |
|  | exp(b) | 95% CI | *p*-value |  | exp(b) | 95% CI | *p*-value |
| MPR (continuous) | 0.85 | 0.24 – 3.02 | 0.77 |  | 5.37 | 2.77 -10.38 | 0.002 |
|  | Adjusted R2 = 1.35% | | |  | | | | |
| Age (years) | 0.99 | 0.98 – 1.00 | 0.31 |  | 0.99 | 0.99 – 1.00 | 0.183 |
|  | Adjusted R2 = 15.63% | | |  | | | | |
| Study Duration (months) | 1.00 | 0.99 – 1.01 | 0.77 |  | 1.01 | 1.01 - 1.01 | 0.001 |
|  | Adjusted R2 = 0.8% | | |  | | | | |
| Country | | | |  | | | | |
| Canada | (ref) |  |  |  | (ref) |  |  |
| South Korea | 1.15 | 0.50 - 2.65 | 0.71 |  | 4.85 | 2.30 - 10.23 | 0.004 |
| USA | 1.62 | 0.79 – 3.34 | 0.16 |  | 5.15 | 2.93 - 9.06 | 0.001 |
|  | Adjusted R2 = 36.45% | | |  | | | | |
|  |  |  |  |  |  |  |  |
| Adjusted R2 |  |  |  |  | 99.9% |  |  |
| K |  |  |  |  | 10 |  |  |

*K* is the number of studies involved in the meta-analysis

**Table S5: Meta regression analysis** (Dependent variable: log of ORs for asthma exacerbation/ED visits

| Variable | Model 1 (univariate) | | |  | Model 2 (multivariate) | | | |
| --- | --- | --- | --- | --- | --- | --- | --- | --- |
| exp(b) | 95% CI | *p*-value |  | exp(b) | 95%CI | *p-*value |
| MPR (category) |  |  |  |  |  |  |  |
| ≤ 0.33 | (ref) |  |  |  | (ref) |  |  |
| ≤0.50 | 0.74 | 0.34 – 1.60 | 0.38 |  | 1.66 | 1.01 - 2.76 | 0.049 |
| ≤0.75 | 1.08 | 0.57 – 2.05 | 0.78 |  | 2.31 | 1.62 – 3.29 | 0.009 |
| ≥0.80 | 0.65 | 0.27 – 1.59 | 0.29 |  | 0.44 | 0.32 – 0.61 | 0.002 |
|  | Adjusted R2 = 37.60% | | |  | | | | |
| Age (years) | 0.99 | 0.98 – 1.00 | 0.31 |  | 1.00 | 0.99 -1.01 | 0.753 |
|  | Adjusted R2 = 15.63% | | |  | | | | |
| Study Duration (m) | 1.00 | 0.99 – 1.01 | 0.77 |  | 1.01 | 1.00-1.02 | 0.004 |
|  | Adjusted R2 = 0.80% | | |  | | | | |
|  |  |  |  |  |  |  |  |
| Adjusted R2 |  |  |  |  | 99.88% |  |  |
| K |  |  |  |  | 10 |  |  |

**APPENDIX E: PUBLICATION BIAS TESTS**

**Table S6: Egger's regression intercept**

| Intercept | 0.051 |
| --- | --- |
| Standard error | 5.245 |
| 95% lower limit (2-tailed) | -12.044 |
| 95% upper limit (2-tailed) | 12.145 |
| t-value | 0.0096 |
| df | 8.000 |
| P-value (1-tailed) | 0.496 |
| P-value (2-tailed) | 0.993 |

**Table S7: Fail-safe N tests**

Classic fail-safe N

| Z-value for observed studies | 94.258 |
| --- | --- |
| P-value for observed studies | 0.000 |
| Alpha | 0.050 |
| Tails | 2.000 |
| Z for alpha | 1.959 |
| Number of observed studies | 10.000 |
| Number of missing studies that would bring p-value to > alpha | 3118.000 |

Orwin's fail-safe N

| Point (log) in observed studies | 0.876 |
| --- | --- |
| Criterion for a 'trivial' point (log) | 0.2000 |
| Mean point (log) in missing studies | 0.000 |
| Number missing studies needed to bring point (log) under 0.2 | 34.000 |

**
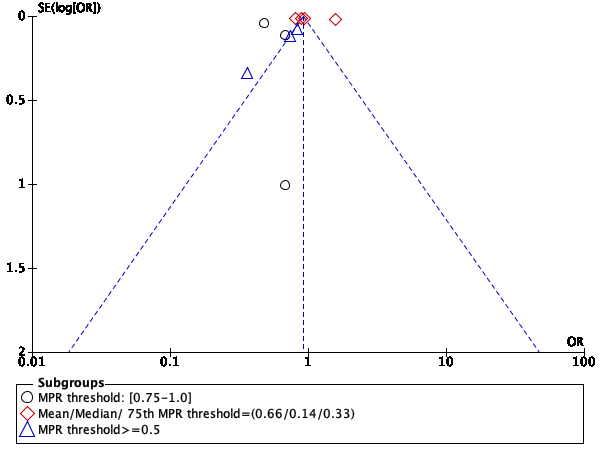
**

**Figure S1: Funnel plot**

**APPENDIX F: ADHERENCE MEASURES AND CUT-OFF POINTS**

**Table S8: Adherence measures and cut-off points/threshold**

| **Adherence metric & related measures** | **Adherence cut-off/threshold** | | **Reference** |
| --- | --- | --- | --- |
| **Adherence**  (*good or high-medium*) | **Non-adherence**  (*Poor or low*) |
| PDC | 20%-67% |  | (30) |
| PDC ≥ 0.5; PDC ≥ 0.8 |  | (50) |
| PDC =100% | PDC <100% | (15) |
| PDC≥80 adherent, | PDC <80 as non-adherent. | (59) |
| PDC≥80%, PDC≥70%, PDC≥60%, PDC≥50%. |  | (36) |
| mean PDC≥0.5; PDC≥0.8 |  | (21) |
| PDC ≥50% and ≥80% |  | (42) |
| Adjusted PDC | PDC ≥75%) | PDC < 75%, | (47) |
| MPR | Medium-high = MPR ≥0.5, MPR ≥ 0.8 | Low = MPR<0.5 | (19) |
| Good = MPR > 0.75, intermediate =MPR: 0.74-0.51, poor <0.5. | MPR ≤ 0.5 | (56) |
| MPR ≥ 80%, | MPR <80% | (14) |
| Excess adherence (MPR >100%. | MPR≤100% | (60) |
| Values above the median MPR | Values below the median MPR | (57) |
| Values above the median MPR | Values below the median MPR | (43) |
| MPR >80%; patients with at least 2 prescriptions | MPR <80%; patients with only 1 prescription | (37) |
| 75th Percentile of MPR values; MPR=1 or 100%. |  | (40) |
| MPR ≥ 80%, | MPR< 80% | (38) |
| MPR>0.80 | MPR < 0.80 | (45) |
| MPR ≥80% | MPR < 80% | (49) |
| Continuous Medication Availability (CMA I), CMA II) | CMAI ≥ 80%, and CMA II ≥80%. |  | (39) |
| Persistence | Absence of treatment gap ≥30 days. |  | (21) |
| AMR | AMR ≥ 0.5 |  | (19) |

**Table S9: Additional summary of study characteristic**

| **Author** | **Definition/Diagnosis of asthma** | **Mean Medication Adherence Rate± Standard deviation** | **Medication Adherence rate Threshold** | **Probability to reach the targeted clinical /surrogate outcome with Medication Adherence Threshold (Odds ratios [OR], Hazards ratios [HR] and Confidence Interval [CI])** | **Methods of Threshold Determination** | **Nonadherence Prevalence** | |
| --- | --- | --- | --- | --- | --- | --- | --- |
| Averell et al (50) | The study used ICD-9/ICD-10 codes (493.xx, J43.x) to identify asthma patients. Additionally, patents were included if they had records of at least 1 prescription fill of furoate/vilanterol (FF/VI) or fluticasone propionate/salmeterol (FP/SAL). | PDC  0.34–0.45 | ≥0.5 or ≥0.8 | **Medication Adherence**  Adjusted odds of FF/VI  initiators achieving PDC ≥0.5 was 2.14 (95% CI: 1.95–2.36) compared with BF initiators  Adjusted odds of FF/VI versus BF initiators achieving PDC ≥ 0.8 was 2.84 (95% CI: 2.46–3.26)  Adjusted odds of FF/VI vs FF/SAL achieving PDC ≥0.5 was 2.11 (95% CI: 1.90–2.35) and PDC≥0.80 was 2.49 (95% CI: 2.16–2.88)  **Medication discontinuation**  (adjusted HR = 0.70; 95% CI: 0.66–0.74) FF/VI versus BF and (adjusted HR = 0.73; 95% CI: 0.68–0.77) for FF/VI versus and FP/SAL | Propensity score matching (PSM), Inverse Probability weighting (IPWT) and multivariable regressions  Survival analysis;  Log rank | **PDC ≥0.5**  FF/VI vs B/F  74.0%  FF/VI vs FP/SAL  74.5%  PDC ≥0.8  FF/VI vs B/F  90.2%  FF/VI vs FP/SAL  89.5% | |
|  |  |  |  |  |  |  | |
| **Author** |  | **Mean Medication Adherence Rate± Standard deviation** | **Medication Adherence rate Threshold** | **Probability to reach the targeted clinical outcome with Medication Adherence Threshold (Odds ratios [OR], Hazards ratios [HR] and Confidence Interval [CI])** | **Methods of Threshold Determination** | **Nonadherence Prevalence** | |
| Backer et al (51) | Asthma diagnosis was objectively verified by having positive asthma test through either a beta-2-agonist reversibility test, a bronchial challenge test with methacholine or using mannitol. | --- | Min two prescriptions redeemed  PDC ~ unknown threshold | **Medication Adherence**  Prescription redemption  PDC | Descriptive statistics with unadjusted analysis | Prescription redemption  46.0% | |
|  |  |  |  |  |  |  | |
| Balkrishnan and Christensen (52) | Patients were identified with asthma using ICD codes and with prescription of prophylactic inhaled corticosteroids (ICS) | ---- | Med-Total | **Medication Adherence**  Long-term ICS adherence |  |  | |
| **Author** |  | **Mean Medication Adherence Rate± Standard deviation** | **Medication Adherence rate Threshold** | **Probability to reach the targeted clinical outcome with Medication Adherence Threshold (Odds ratios [OR], Hazards ratios [HR] and Confidence Interval [CI])** | **Methods of Threshold Determination** | **Nonadherence Prevalence** | |
| Bidwal et al (19) | Adults (18 +) with current diagnosis of persistent asthma with records of asthma medication refills obtained from the clinic. | ----- | MPR  ≤0.5  ≥0.5  AMR  ≥0.5 | Medication Adherence | Multivariate logistic regression analysis | MPR  66.1% (≥ 0.5)  91.7% (fully adherent ≥0.8)  AMR  10.7% ((≥ 0.5) | |
|  |  |  |  |  |  |  | |
| **Author** |  | **Mean Medication Adherence Rate± Standard deviation** | **Medication Adherence rate Threshold** | **Probability to reach the targeted clinical outcome with Medication Adherence Threshold (Odds ratios [OR], Hazards ratios [HR] and Confidence Interval [CI])** | **Methods for Threshold Determination** | **Nonadherence Prevalence** | |
| Blais et al (54) | Patients who were new users of ICS monotherapy, aged 18-45 years with asthma diagnostic ICD code 493.x who have used at least 3 doses of SABA per week. | 52.6±33.0  19.1±16.5 | PPDC-  PDC- | Medication Adherence | Descriptive statistics | 41.0% estimated using PDC | |
| **Author** |  | **Mean Medication Adherence Rate± Standard deviation** | **Medication Adherence rate Threshold** | **Probability to reach the targeted clinical outcome with Medication Adherence Threshold (Odds ratios [OR], Hazards ratios [HR] and Confidence Interval [CI])** | **Methods of Threshold Determination** | **Nonadherence Prevalence** | |
|  |  |  |  | Medication adherence | Descriptive statistics | Not reported | |
| Blais et al (58) | Asthma patients with filled new ICS prescription in the Quebec prescription claims databases were identified as the study cohort. | --- | --- | Days’ supply  Number of refills |  |  | |
| Blais et al (53) |  | PDC  Children 30.3 ± 25.9  Adults 36.6 ± 36.0 | ≥ 1 refill in 12 months | Adherence to ICS | Descriptive statistics | Children; 10.6%  Adults; 30.6% | |
| **Author** |  | **Mean Medication Adherence Rate± Standard deviation** | **Medication Adherence rate Threshold** | **Probability to reach the targeted clinical outcome with Medication Adherence Threshold (Odds ratios [OR], Hazards ratios [HR] and Confidence Interval [CI])** | **Methods of Threshold Determination** | **Nonadherence Prevalence** | |
| Covvey et al (55) | Patients with physician diagnosed (GP recorded diagnosis) asthma and COPD, having records of at least one prescription | ---- | MPR ≥0.80  MPR<0.80 | Adherence to inhaled therapies  Persistence to inhaled therapies | Binary logistic regression analysis  Kaplan–Meier Survival analysis | 88% (non-persistence) | |
|  |  |  |  |  |  |  | |
| Darba’ et al (27) | All asthmatic patients who used ICS/LABA in the database. | ---- | MPR≥0.80 | ----- | Logistic regression | ----- | |
| **Author** |  | **Mean Medication Adherence Rate± Standard deviation** | **Medication Adherence rate Threshold** | **Probability to reach the targeted clinical outcome with Medication Adherence Threshold (Odds ratios [OR], Hazards ratios [HR] and Confidence Interval [CI])** | **Methods of Threshold Determination** | **Nonadherence Prevalence** | |
| D’Ancona et al (56) | Patients with confirmed severe asthma requiring at least 5mg prednisolone daily for at least 6months and having peripheral blood eosinophil count of at least 300 cells.μL-1 . | 0.82±0.32 | MPR <0.5 (poor)  0.5 – 0.74 (intermediate)  ⩾0.75 (good) | OCS dose reductions  (100 vs 60, p=0.031)  AER change  (−2.1 ± 3.1 vs 0.3 ± 2.5; p = 0.011)  Stopping maintenance OCS  (Adjusted OR 3.19, 95% CI 1.02–9.94; *p*=0.045). | Descriptive statistics  Linear regression analysis | 32% (suboptimal adherence)  16% (poor adherence) | |
|  |  |  |  |  |  |  | |
| Delea et al (49) | All individuals in the database with at least one medical claim during the period of the study with asthma diagnostic ICD09-CM code of 493.xx in addition to at least 2 outpatient pharmacy claims of asthma medications | MPR (54%) | MPR  <25%  25 - <50%  50% - <75%  ≥75% | Each 25% improvement in adherence was associated with a 10% reduction in the odds of asthma-related ED visit or hospitalization (p<0.001), a 10% reduction in the odds of receiving SABA (p<0.001), a 3% reduction in the odds of receiving a corticosteroid (p=0.027) | Multivariate general linear model (GLM) regression analysis | 79.8% (estimated by MPR ≥75%) | |
|  |  |  |  |  |  |  | |
| Feehan et al (29) | Asthma patients dispensed with at least one controller asthma medication for chronic use were included in the study cohort. | PDC 42±2.7  MPR 43±2.9 | PDC ≥ 80%  MPR ≥ 80% | Adherence to controller medications | Descriptive statistics | 86% (estimated using PDC)  84% (estimated using MPR) | |
| Friedman et al (15) | All patients enrolled in the health plan, 12-25 years with no history of other chronic pulmonary condition but only identified as asthma using the asthma diagnostic codes: 493.0X, 493.1X, or 493.9X | ---- | ---- | Adherence in MF-DPI vs FP using PDC (23.5% vs. 14.5%; *p<* 0.0001) and prescription fills (2.70 vs. 1.91; *p <* 0.0001)  Mean SABA canister claims in MF-DPI vs FP (1.04 vs. 1.40; *p <* 0.0001)  Mean exacerbations in MFDPI vs FP(0.12 vs. 0.14; *p* = .5335) | Propensity Score Analysis  Multivariate generalized linear model analyses | ---- | |
| **Author** |  | **Mean Medication Adherence Rate± Standard deviation** | **Medication Adherence rate Threshold** | **Probability to reach the targeted clinical outcome with Medication Adherence Threshold (Odds ratios [OR], Hazards ratios [HR] and Confidence Interval [CI])** | **Methods of Threshold Determination** | **Nonadherence Prevalence** | |
| Gelzer et al (30) | Patients were identified as having primary diagnosis of asthma (ICD-9, 493.xx and prescription fills for asthma controllers. | ---- | PDC 20-67% | Mean PDC rate in managed care-led interventions between two groups (+4.9% and +7.2%; *p* = 0.01 and *p* = 0.03, respectively)  Reductions in ED visits (asthma-related: −23.0% and −17.5%, respectively; *p* < 0.01), and IP admissions (asthma-related: −37.1% and −40.0%, respectively; *p* < 0.01) between two groups on managed care-led interventions | Paired t-tests  Repeated analysis of variance | --- | |
|  |  |  |  |  |  |  | |
| Guo et al (31) | Patients identified as moderate to severe asthma with prescription of ICS-and -LABA. | MPR  [0.23 (median 0.14)] for ICSs  [0.66 (median 0.46)] for all asthma medications | --- | odds ratios of an asthma related  emergency department (ED) visit was 0.81 (0.79-0.84) for a higher ICS-and-LABA MPR, but the odds ratio of asthma-related hospitalization or intubation was  1.56 (1.50-1.62) | Logistic Regression Analysis | --- | |
| Hagiwara et al (32) | Asthma cohort identified using ICD-9 codes and prescription of asthma related medications | MPR  MF [57.2 (27.2)]  FSC 100/50 [59.3 (27.1)] | undefined | Compared to MF patients, patients who received FSC 100/  50 had lower ICS MPR for MF vs FSC100/50 patients (57.2 vs.  59.3, p < .001) and refill rate (4.1 vs. 4.4, p < .001) | Propensity score analysis  Descriptive statistics | ---- | |
| Hardstock et al (33) | Patients with asthma using ICD-codes with long term usage of asthma medications | MPR (80.6)  PDC (83.2) | MPR and PDC ≥80% | Adherence in prescription-based and interval-based analysis | Not reported | 38.42% estimated by MPR  32.52% estimated by PDC | |
| **Author** |  | **Mean Medication Adherence Rate± Standard deviation** | **Medication Adherence rate Threshold** | **Probability to reach the targeted clinical outcome with Medication Adherence Threshold (Odds ratios [OR], Hazards ratios [HR] and Confidence Interval [CI])** | **Methods of Threshold Determination** | **Nonadherence Prevalence** | |
| Ismaila et al (14) | Patients identified from the database using ICD-9 CM codes 493.xx, in addition to prescription of asthma medications. | ---- | MPR ≥ 80%  Persistence (absence of treatment gap ≥30 days) | MPR <80% ≥ 80%  Persistence (absence of treatment gap ≥30 <30 days)  Exacerbations  OR; 0.48 (0.44-0.54) p=0.001  OR; 0.42 (0.38-0.48) p=0.001  SABA Use  OR; 1.00 (0.91-1.11) p=0.972  OR; 0.68 (0.61-0.76) p=0.001  OCS Use  OR; 0.46 (0.42-0.52) p=0.001  OR; 0.36 (0.32-0.40) p=0.001  ER Visits  OR; 0.48 (0.36- 0.64) p=0.001  OR; 0.31 (0.21- 0.46) p=0.001  Hospitalizations  OR; 0.49 (0.42-0.57) p=0.001  OR; 0.41 (0.35-0.49) p=0.001  ICU Admission  OR; 0.62 (0.39-0.98) p=0.041  OR; 0.14 (0.07-0.28) p=0.001  Intubation  OR; 0.72 (0.31-1.64) p=0.427  OR; 0.05 (0.01-0.26) p=0.001  Respirologist Visit  OR; 0.88 (0.79-0.99) p=0.032  OR; 0.43 (0.38-0.50) p=0.001  GP Visit  OR; 0.63 (0.56-0.71) p=0.001  OR; 0.45 (0.39-0.52) p=0.001 | Multivariate logistic regression | 57.3% estimated using MPR  70.7% (non-persistence) | |
| Kang et al (18) | Patients identified using ICD-10 codes for asthma (J45, J46) and one prescription of asthma medications. | --- | MPR<20%  20%≤MPR<50%  MPR≥50% | MPR≥50% compared with  MPR (<20%) showed ORs of 0.828 (95% CI 0.707-0.971) and 0.362 (0.185-0.708) in moderate and severe asthma, respectively. | Multivariate logistic regression analysis | 91.4% | |
| Kelloway et al  (34) |  | 56.5% **±** 28.6 | Not reported | Adherence with ICS before (49.7% vs 29.3%)  and after (56.5% ±28.6%) salmeterol introduction (*p=*0.0785, pre vs post) | Multivariate linear regression | Not reported | |
| **Author** |  | **Mean Medication Adherence Rate± Standard deviation** | **Medication Adherence rate Threshold** | **Probability to reach the targeted clinical outcome with Medication Adherence Threshold (Odds ratios [OR], Hazards ratios [HR] and Confidence Interval [CI])** | **Methods of Threshold Determination** | **Nonadherence Prevalence** | |
| Makhinova et al (36) | Patients identified as having charted diagnosis of asthma and had records prescribed in haled corticosteroids (ICS) | PDC 32.2% ± 19.7% | PDC < 50  PDC ≥ 50 | Patients with PDC ≥ 50% is 97% more likely to have ≥ 6 SABA claims when compared to patients with PDC < 50% patients (OR = 1.967; 95% CI = 1.826-2.120; *p* < 0.001). As for OCS use, adherent patients had 0.11 fewer claims compared with non adherent patients (*p* < 0.001) | Multivariate logistic and linear regression analyses | Adherence to asthma controller medication, risk of exacerbation, and use of rescue agents. | |
| Navaratnam et al (35) | Cohort identified using ICD-9 codes for asthma: 493.xx and records of filled asthma medications. | ---- | PDC | *Category A*: 24% adherence to mometasone furoate (MF); 15% adherence to fluticasone propionate (FP).  *Category B*: 27% adherence to mometasone furoate (MF), 15% adherence to FP. | Multivariate Generalized Linear Model (GLM) with Poisson distribution | --- | |
| **Author** |  | **Mean Medication Adherence Rate± Standard deviation** | **Medication Adherence rate Threshold** | **Probability to reach the targeted clinical outcome with Medication Adherence Threshold (Odds ratios [OR], Hazards ratios [HR] and Confidence Interval [CI])** | **Methods of Threshold Determination** | **Nonadherence Prevalence** | |
| Papi et al  (37) | Patients identified as asthma using Read codes indicating physician-diagnosed asthma. Records of prescribed medication was also added as a selection criterion. |  | MPR >80%  MPR ≤ 80% | Patients with MPR >80%  in the elevated blood eosinophil group had 2 or more asthma exacerbations (14.0% vs 7.2%; *p* = 0.003) and uncontrolled asthma (73% vs 60.8%; *p* = 0.004) compared to those with MPR ≤ 80% | Multinomial and  binomial logistic regression analysis | 80.65% | |
|  |  |  |  |  |  |  | |
|  |  |  |  |  |  |  | |
| Sicras-Mainar et al (38) | Based on ICD codes and asthma medications | ---- | MPR ≥ 80%  MPR < 80% | --- | --- | --- | |
|  |  |  |  |  |  |  | |
| [Souverein](https://www-sciencedirect-com.qe2a-proxy.mun.ca/science/article/pii/S2213219816304238#!) et al (39) | Patients who had received one or more ICS prescription and had recorded physician diagnosis of asthma. | 60% ± 0.31% and 35.26% | CMA (I&II) ≥ 80%  CMA < 80% | Medication adherence (persistence and implementation) | Chi-square tests  Independent *t* tests  Mann Whitney *U* tests | 64.74% | |
| **Author** |  | **Mean Medication Adherence Rate± Standard deviation** | **Medication Adherence rate Threshold** | **Probability to reach the targeted clinical outcome with Medication Adherence Threshold (Odds ratios [OR], Hazards ratios [HR] and Confidence Interval [CI])** | **Methods of Threshold Determination** | **Nonadherence Prevalence** | |
| Standford et al (21) | Patients with prescription of asthma medications, 18 years and older with diagnosis of asthma | ---- | PDC ≥ 80%  PDC < 80%  AMR ≥ 50%  AMR < 50% | Patients initiating treatment with FF/VI had 72% greater odds (OR; 1.72; 95% CI, 1.48-2.00;  P < .001) of achieving a PDC ≥ 0.5 and 86% greater odds of achieving a PDC ≥ 0.8 (OR; 1.86; 95% CI, 1.51-2.30; P < .001) compared with those on BUD/F  Patients initiating treatment with FF/VI had 26% lower risk of discontinuation (HR; 0.74;  95% CI, 0.69-0.79), and 36% greater odds of an AMR ≥0.50 (OR; 1.36; 95% CI, 1.23-1.50) compared with BUD/F. | Propensity-score matching, logistic regression and Cox-proportional hazard models | 67.55% (estimated by PDC ≥50%)  88.23% (estimated by PDC ≥80%)  34.55% (estimated by AMR ≥50%) | |
| Stern et al (40) | Patients identified with asthma diagnosis (ICD-9: 493.xx and with at least one prescription of asthma medication | MPR 0.24 ±0.25 | < Median cut off point ≥ Median cut off point  ≥ 75% cut off point  < 75% cut off point | **Median MPR:** Compliant vs less complaint patients (OR; 0.94; 95% CI, 0.91– 0.97; *p=*0.001) for risk of exacerbation.  **75% MPR cut off:** Risk of exacerbation was further reduced (OR, 0.89; 95% CI, 0.86–0.92; 20.0% vs 21.8%; *p=* 0.001)  **All cut offs:** Compliance showed significantly less exacerbations in compliant vs non-compliant | Multivariate logistic regression analysis | 49.1% (using median cut off point)  74.9% (using median cut off point) | |
| Svedsater et al (42) | Patients with records of prescription of any ICS/LABA with physician diagnosis of asthma using ICD codes. | ---- | PDC ≥50%  PDC ≥ 80% | Medication Adherence by PDC  Persistence of ICS/LABAs  Median PDC was 89.2  (61.6–100.0) for FF/VI and 75.9  (50.5–98.0) for BDP/FM (p<0.0001), with significantly higher odds of achieving _50% and _80% PDC for FF/VI versus  BDP/FM (747/893 [83.7%] vs 2600/3433 [75.7%]; odds  ratio=1.50; 95% CI 1.23–1.83; p<0.001 and 526/893  [58.9%] vs 1571/3433 [45.8%]; odds ratio=1.57; 95% CI  1.35–1.83; p<0.001, respectively; per-protocol analyses) | Multivariate logistic regression, Cox-proportional hazard models |  | |
| Taylor et al (41) | Patients with physician diagnosis of asthma in the database and with ICS prescription. | ---- |  | Adherence to ICS measured by PPR |  |  | |
| **Author** |  | **Mean Medication Adherence Rate± Standard deviation** | **Medication Adherence rate Threshold** | **Probability to reach the targeted clinical outcome with Medication Adherence Threshold (Odds ratios [OR], Hazards ratios [HR] and Confidence Interval [CI])** | **Methods of Threshold Determination** | **Nonadherence Prevalence** | |
| Vaidya et al (57) | Patients identified using asthma diagnostic ICD-9 codes, and records of prescribed asthma medications | MPR 0.34 | Median MPR  ≥0.25  <0.25 | Higher adherence to ICS is associated with significantly higher total health expenditure than lower adherence ($19,223 vs. $12,840 p<.0001) | Multivariate regression analysis (generalized linear model with a log link function and gamma distribution) | --- | |
|  |  |  |  |  |  |  | |
| Vaidya et al (43) | Cohort identified using ICD-9-CM codes to identify physician diagnosed asthma and having records of prescribed asthma medications. | MPR 0.45 | Median MPR  ≥0.45  <0.45 | Compared with patients on US$0–15 cost-sharing level, patients on US$16–30 (OR; 0.449, 95% CI; 0.312–0.616), US$31–45 (OR; 0.246, 95% CI; 0.168–0.358) and US$46 or higher (OR; 0.131, 95% CI; 0.084–0.206) levels all had lower odds of acceptable medication adherence | Logistic regression analysis | --- | |
| **Author** |  | **Mean Medication Adherence Rate± Standard deviation** | **Medication Adherence rate Threshold** | **Probability to reach the targeted clinical outcome with Medication Adherence Threshold (Odds ratios [OR], Hazards ratios [HR] and Confidence Interval [CI])** | **Methods of Threshold Determination** | **Nonadherence Prevalence** | |
| Van Boven et al (44) | Physician diagnosed asthma and with records of prescribed asthma medications | ---- | Group-based trajectory  modeling (GBTM): -categorized into non-persistent, seasonal use, poor adherence and good adherence. | Poor adherence (58%), nonpersistent use (20%), seasonal use (8%), and good adherence (13%). Poor adherence was associated with longer time to additional GINA-5 (adjusted HR: 0.58; 95% CI: 0.35-0.95. | Multivariable Cox proportional  hazards models | Poor adherence rate was 58% | |
| **Author** |  | **Mean Medication Adherence Rate± Standard deviation** | **Medication Adherence rate Threshold** | **Probability to reach the targeted clinical outcome with Medication Adherence Threshold (Odds ratios [OR], Hazards ratios [HR] and Confidence Interval [CI])** | **Methods of Threshold Determination** | **Nonadherence Prevalence** | |
| Vervloet et al (46) | Physician diagnosed asthma and with records of prescribed asthma medications | ---- | ICS implementation  (1 - 99%) | ICS implementation (percentage of days covered by the prescription on the basis of quantity, dosage, and duration and computed for each prescription interval) vs RDAC (composite outcome) ICS was weakly positively associated with simultaneous RDAC. | Multilevel analysis | ---- | |
| Williams et al (45) |  | CMA (0.50 ± 0.37)  CMG (0.54 ± 0.27) | ----- | Adherence to ICS correlated negatively with the number of ED visits ([R] = 20.159), the number of fills of OCS (R = 20.179), and the total days’ supply of OCS (R = 20.154). Each 25% increase in the proportion of time without ICS resulted in doubling of the rate of asthma-related hospitalization (relative rate, 2.01; 95% CI, 1.06-3.79) | Poisson regressions | ----- | |
| **Author** |  | **Mean Medication Adherence Rate± Standard deviation** | **Medication Adherence rate Threshold** | **Probability to reach the targeted clinical outcome with Medication Adherence Threshold (Odds ratios [OR], Hazards ratios [HR] and Confidence Interval [CI])** | **Methods of Threshold Determination** | **Nonadherence Prevalence** | |
| William (50) |  | CMA (23.6%) | ------ | Adherence was associated with a reduction in exacerbations but was only statistically significant among individuals whose adherence was >75% of the prescribed dose (HR; 0.61; 95% CI; 0.41–0.90) compared with individuals whose adherence was ≤25%. About 24% of exacerbations attributable to ICS non-adherence. | Proportional hazard models | ----- | |
|  |  |  |  |  |  |  | |
| Woodcroft et al (48) |  | Adherence to ICS/LABA: mean ± SD PDC: 47.4 ± 28.8%; Adherence to ICS: - 40.8 ± 29.1% |  | The rate of inpatient admissions among persistent asthmatic patients who filed ICS was 1.75 (1.48, 2.05) per 100 persons-years, rate for ED was 13.55 (12.77, 14.35) per 100 person-years, and urgent care visits for asthma was 2.71 (2.37, 3.09) per 100 person-years. Similarly, the rate for inpatient admissions, ED and urgent care visits among asthma patients who filled ICS/LABA were 1.97 (1.67, 2.3), 12.79 (12.01, 13.6), and 2.76 (2.41, 3.15), respectively. | --- | --- | |
| Wu et al (47) |  | ----- | PDC ≥ 75% | LTR less likely to be primary adherent than those on ICS (OR;  0.82; 95% CI, 0.74–0.92) or ICS/LABA (OR; 0.88; 95% CI; 0.80–0.97)  LTRA more likely to be early-stage persistent than those on ICS (OR, 1.82; 95% CI, 1.64–2.04). LTRA or ICS/LABA more likely to be adherent as measured by adjusted PDC≥75% than those prescribed ICS (OR, 6.21 [95% CI, 5.41–7.19] and 2.13 [95% CI, 1.82–2.48], respectively). | Multivariate logistic regression analysis | 96.74%  (Estimated with PDC ≥75%) | |
| Zhang et al (49) | Patients with incident diagnosis of asthma based on the Global Initiative of Asthma (GINA) steps 4-5 recommendations. | ----- | MPR ≥80% | Average direct healthcare cost per year of severe asthmatic who are adherent vs non adherent patients ($1,937 vs. $1,596, P<0.001) | Poisson regression and Generalized Linear Models | | ---- |
